# Supplementary material for: Curvotaxis directs cell migration through cell-scale curvature landscapes
Source: PubMed Central journal article supplement (PMC6162274; doi:10.1038/s41467-018-06494-6), 2018-09-28
Supplement: 41467_2018_6494_MOESM1_ESM.pdf [file 41467_2018_6494_MOESM1_ESM.pdf]

**Curvotaxis directs cell migration through cell-scale curvature landscapes.**

**Pieuchot *et al.***

**Supplementary Information**

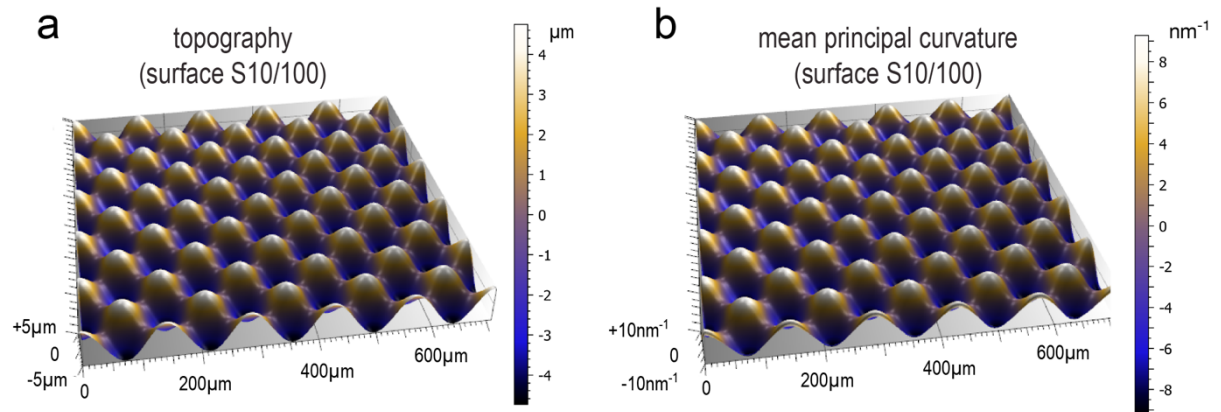

**C**

| Surface                             | S3/30 | S1/100 | S3/100 | S5/100 | S10/100 | S30/300 |
|-------------------------------------|-------|--------|--------|--------|---------|---------|
| Period ( $\mu\text{m}$ )            | 30    | 100    | 100    | 100    | 100     | 300     |
| Amplitude ( $\mu\text{m}$ )         | 3     | 1      | 3      | 5      | 10      | 30      |
| Rho ( $\mu\text{m}$ )               | 22    | 912    | 313    | 182    | 92      | 283     |
| Curvature max. ( $\text{nm}^{-1}$ ) | 45,4  | 1,9    | 3,2    | 5,5    | 10,9    | 3,5     |

**Supplementary figure 1. (a and b).** Surface analysis showing a topographical map of the S10/100 surface (a) and the corresponding curvature map (b). Curvature is visualized using the mean curvature:  $\mathbf{K}_{\text{mean}} = \frac{1}{2} * (\mathbf{\kappa}_1 + \mathbf{\kappa}_2)$  where  $\mathbf{\kappa}_1$  is the maximal curvature and  $\mathbf{\kappa}_2$  is the minimal curvature. (c) Numerical description of the sinusoidal surfaces used in this study.

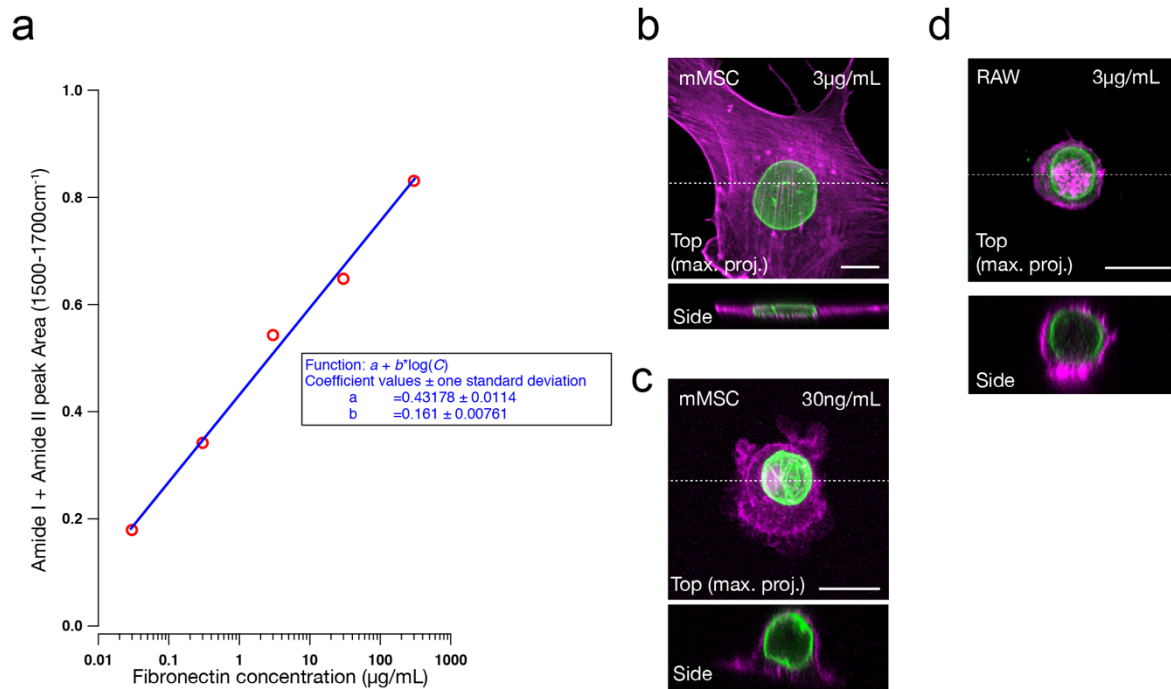

**Supplementary figure 2. (a)** Relation between amid peak intensity and fibronectin concentration. **(b and c)** Impact of ligand density on actin cytoskeleton (magenta) and nuclear lamina (green) on mMSC spreading. **(d)** Actin cytoskeleton (magenta) and lamina (green) of a macrophage (RAW cell). Scale bars: 10μm.

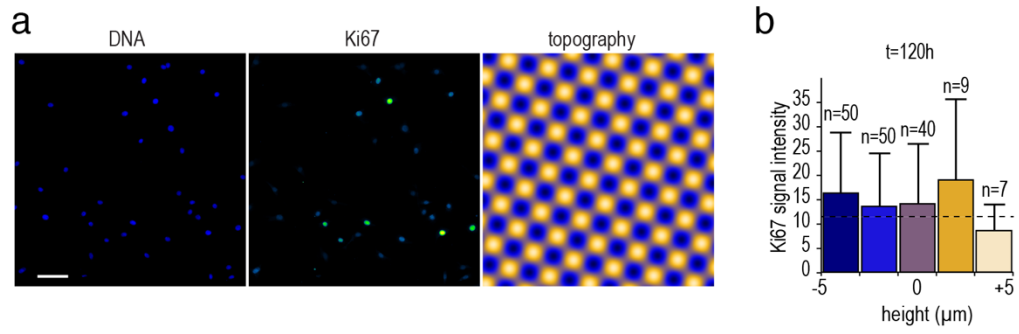

**Supplementary figure 3. (a and b)** Ki67 staining of cells on a S10/100 surface and quantification of the signal according to surface topography. Scale bar: 100μm.

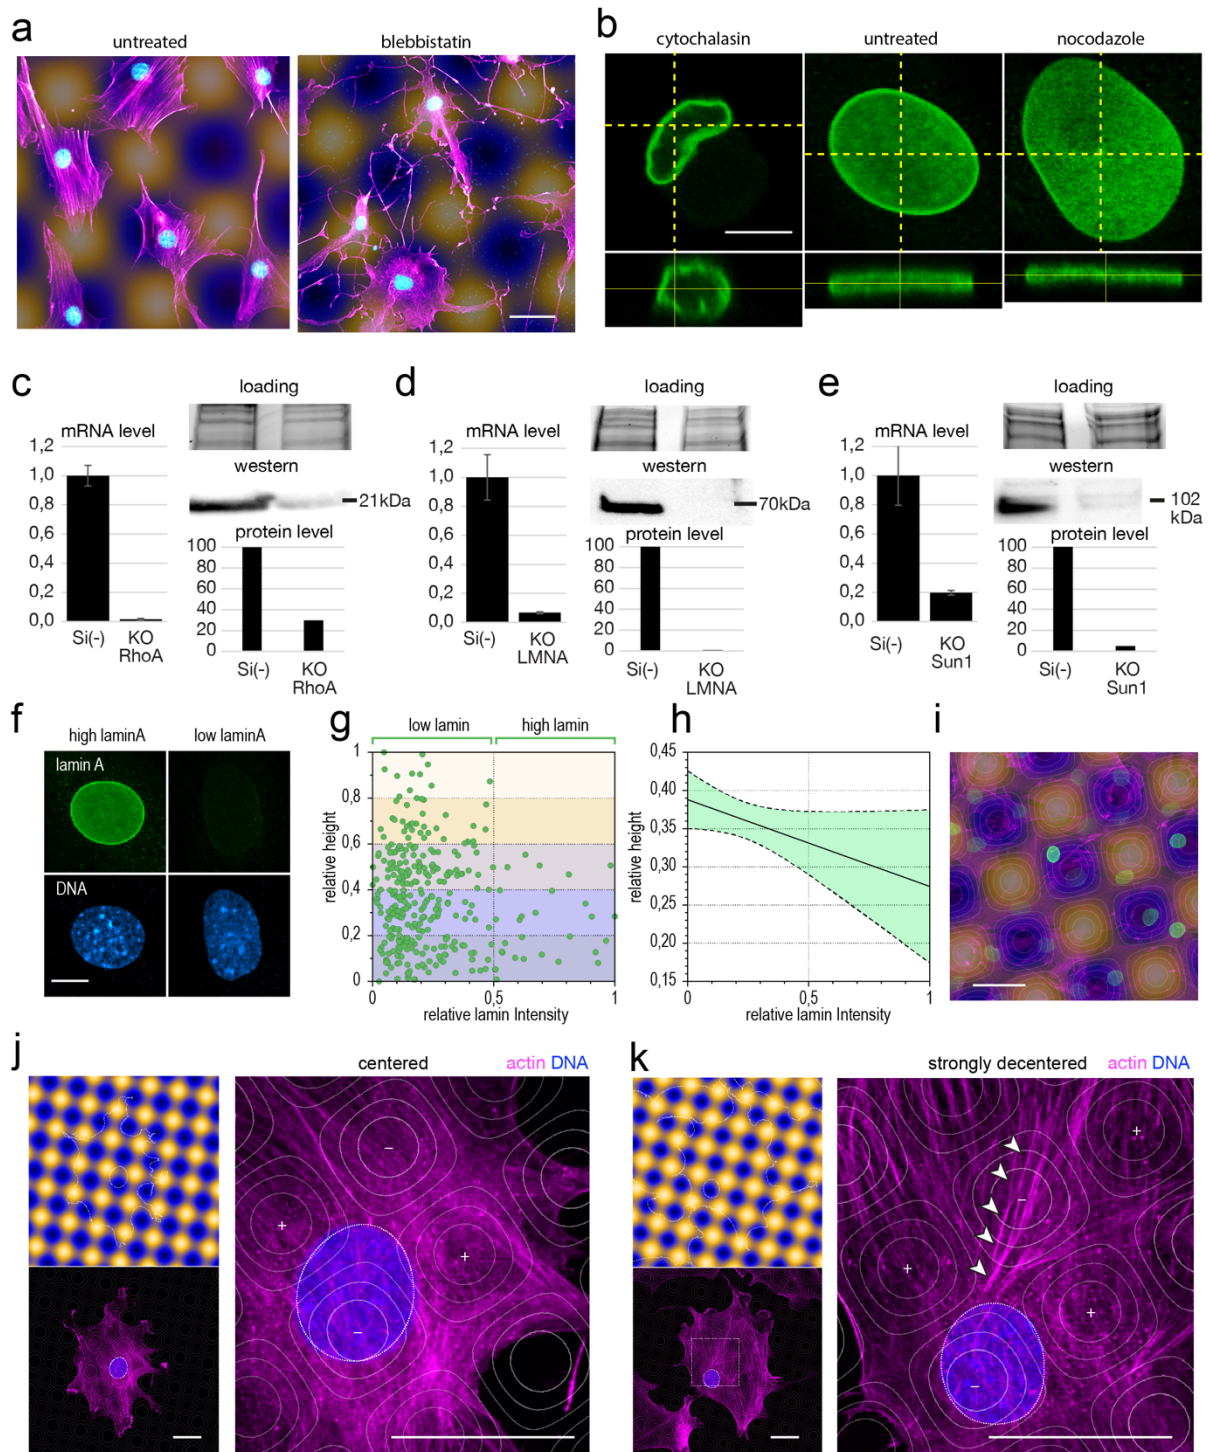

**Supplementary figure 4. (a)** Impact of blebbistatin on cells stained for actin. **(b)** Impact of cytochalasin and nocodazole on nuclear envelope morphology. **(c, d and e)** Impact of siRNA treatments on targeted mRNAs and proteins levels. (RhoA in **c**, LaminA in **d** and Sun1 in **e**). **(f, g, h and i)** Effect of siRNAs targeting laminA on cell distribution. Endogenous laminA

variations detected after immunostaining (**f**) is correlated with surface topography (**g**, **h** and **i**). (**j and k**) Immunostainings of cells adhering on S3/30 surfaces showing surface topography, DNA and the actin cytoskeleton. Arrowheads highlight actin stress fibers. Scale bars: 30 $\mu$ m in (a), 10 $\mu$ m in (b), 5 $\mu$ m in (f), 50 $\mu$ m in (i), 30 $\mu$ m in (j) and (k).

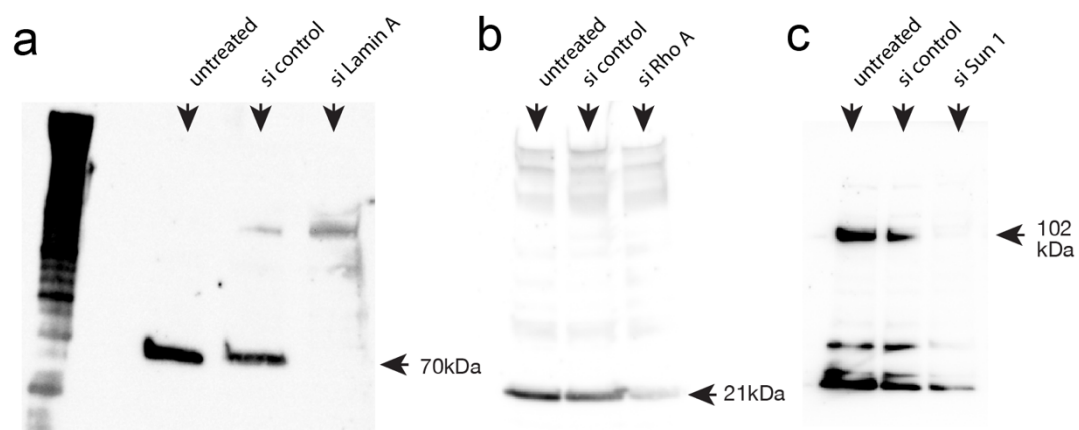

**Supplementary figure 5.** Full uncropped western blots showing Lamin A, Rho A and Sun 1 proteins from total protein extracts of untreated or RNAi treated C3H10 cells.
