# Supplementary material for: Curvotaxis directs cell migration through cell-scale curvature landscapes
Source: PubMed Central journal article supplement (PMC6162274; doi:10.1038/s41467-018-06494-6), 2018-09-28
Supplement: 41467_2018_6494_MOESM2_ESM.pdf [file 41467_2018_6494_MOESM2_ESM.pdf]

**Editorial Note:** This manuscript has been previously reviewed at another journal that is not operating a transparent peer review scheme. The manuscript was considered suitable for publication without further review at Nature Communications.
